# Supplementary material
Source: PubMed Central journal article supplement (PMC3627198)

Supplemental Figure 1. Spectral trace of co-factor indicates FMN. Concentrated, purified Nmo1/Rv1894c was incubated at 80°C for 20 min to denature the protein then cooled and centrifuged to remove the denatured protein [16]. Supernatant was analyzed with a Nanodrop 2000c across the visible spectrum. The spectral trace is consistent with the presence of flavin mononucleotide, with peaks at 370 nM and 445 nM.

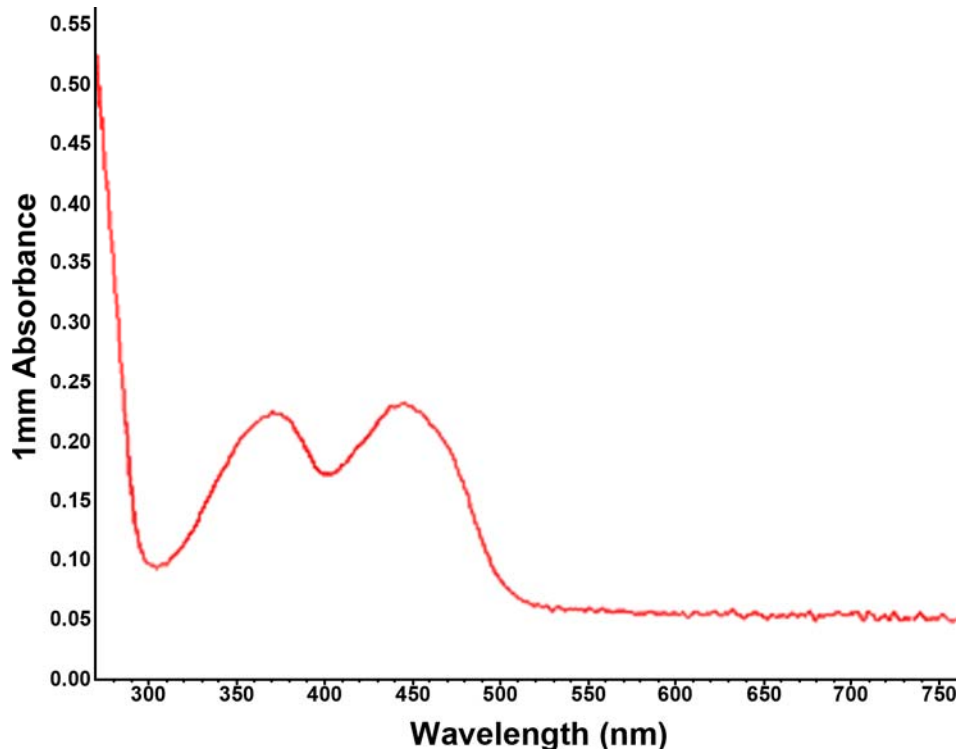

Supplement: supp_jit049_jit049supp.pdf [file supp_jit049_jit049supp.pdf]
